# Supplementary material for: Structure and bonding in three-coordinate N-heterocyclic carbene adducts of iron(ii) bis(trimethylsilyl)amide
Source: Royal Society of Chemistry journal article supplement (doi:10.1039/c1cc14576b), 2011-01-01

Supporting Information for:

**Structure and bonding in three-coordinate N-heterocyclic carbene adducts  
of iron(II) bis(trimethylsilyl)amide**

R. A. Layfield, J. J. W. McDouall, M. Scheer, C. Schwarzmaier and F. Tuna

**General experimental considerations**

All synthetic manipulations were performed using standard Schlenk techniques. Toluene was degassed and dried by refluxing over sodium-potassium alloy under nitrogen. IMes and IPr were synthesized according to a recent literature report,<sup>1</sup> and [Fe{N(SiMe<sub>3</sub>)<sub>2</sub>}<sub>2</sub>] was synthesized according to Lappert's original method.<sup>2</sup>

<sup>1</sup>H NMR spectra were acquired using a Bruker Avance 600 MHz NMR spectrometer equipped with a CryoProbe, operating at the <sup>1</sup>H frequency of 600.25 MHz and a temperature of 298.1 K. Solvents for NMR spectroscopy were distilled under nitrogen off sodium-potassium alloy or molten potassium, and were stored over activated 4 Å molecular sieves for 24 hours before use.

X-ray diffraction data on **2** and **3** were collected on an OXFORD Diffraction Gemini R Ultra CCD diffractometer using Cu<sub>Kα</sub> radiation (λ = 1.54178 Å). Structure solution and refinement was performed using SIR97,<sup>4</sup> SHELXL97<sup>5</sup> and WinGX.<sup>6</sup>

SQUID measurements were carried out on polycrystalline samples of **2** and **3** by enclosing the sample in O-ring-sealed Kel-F capsules. The capsules were transferred to sample holders in a glovebox, transported to the SQUID magnetometer in a sealed Schlenk tube, and then rapidly transferred to the helium-purged sample space of the magnetometer. Corrections for diamagnetism were made using Pascal's constants, and the magnetic susceptibility data for **2** and **3** were modelled according to the following equation:<sup>3</sup>

$$\chi = \frac{\chi_z + 2\chi_{x,y}}{3}$$

$$\text{where: } \chi_z = \frac{2N\beta^2 g^2}{kT} \frac{\exp(D/kT) + 4\exp(-2D/kT)}{\exp(2D/kT) + 2\exp(D/kT) + 2\exp(-2D/kT)}$$

$$\text{and: } \chi_{x,y} = \frac{2N\beta^2 g^2}{3D} \frac{9\exp(2D/kT) - 7\exp(D/kT) - 2\exp(-2D/kT)}{\exp(2D/kT) + 2\exp(D/kT) + 2\exp(-2D/kT)}$$

1. X. Bantrelli, S. P. Nolan, *Nature Protocols*, **2011**, 6, 69.
2. R. A. Anderson, K. Faegri, J. C. Green, A. Haaland, M. F. Lappert, W. -P. Leung, *Inorg. Chem.* **1988**, 27, 1782.
3. O. Kahn, *Molecular Magnetism*, VCH, New York, **1993**.
4. A. Altomare, M. C. Burla, M. Camalli, G. L. Cascarano, C. Giacovazzo, A. Guagliardi, A. G. G. Moliterni, G. Polidori, R. Spagna, SIR 97: A new tool for crystal structure determination and refinement. *J. Appl. Cryst.* **1999**, 32, 115-119.
5. SHELX97 Programs for crystal structure analysis (Release 97-2). (G. M. Sheldrick, Institut für Anorganische Chemie der Universität, Tammanstrasse 4, D-3400 Göttingen, Germany, **1998**).
6. L. J. Farrugia, WinGX suite for small-molecule single-crystal crystallography. *J. Appl. Cryst.* **1999**, 32, 837-838.

**Synthesis of 2.** A solution of IPr (0.12 g, 0.33 mmol) in toluene (8 mL) was added to a stirred solution of  $[\text{Fe}\{\text{N}(\text{SiMe}_3)_2\}_2]$  (0.15 g, 0.33 mmol) in toluene (2 mL) at room temperature. The reaction mixture developed a brown colour during the addition, and was stirred overnight. The resulting solution was filtered, concentrated to a volume of 2-3 mL and stored at  $-28^\circ\text{C}$  overnight, resulting in the formation of large colourless/light-green crystals of **2**·(toluene). Removal of the crystallization solvent followed by washing the crystals with cold pentane and drying in vacuo produced **2** as a light-green polycrystalline material (0.13 g, 53%). Elemental analysis (%) calcd. for  $\text{C}_{39}\text{H}_{72}\text{FeN}_4\text{Si}_4$  C 61.22, H 9.48, N 7.32; found C 61.34, H 9.58, N 7.39.

**Synthesis of 3.** Compound **3** was synthesized in an identical manner to **2**·(toluene), using IMes (0.12 g, 0.39 mmol) and **1** (0.12 g, 0.39 mmol). The product **3** was obtained as colourless/light-green crystals. Placing the crystals under a vacuum for ca. 30 minutes resulted in the formation of light-green polycrystalline **3** (0.16 g, 59 %). Elemental analysis (%) calcd. for  $\text{C}_{33}\text{H}_{60}\text{FeN}_4\text{Si}_4$  C 58.20, H 8.88, N 8.23; found C 58.35, H 8.98, N 8.09.

**Table S1.** Crystal data and structure refinement for [(IPr)Fe{N(SiMe<sub>3</sub>)<sub>2</sub>}<sub>2</sub>] (2)

|                                                     |                                                                  |                        |
|-----------------------------------------------------|------------------------------------------------------------------|------------------------|
| Empirical formula                                   | C <sub>39</sub> H <sub>72</sub> FeN <sub>4</sub> Si <sub>4</sub> |                        |
| Formula weight                                      | 765.22                                                           |                        |
| Temperature                                         | 123(1) K                                                         |                        |
| Wavelength                                          | 1.54178 Å                                                        |                        |
| Crystal system                                      | Triclinic                                                        |                        |
| Space group                                         | <i>P</i> -1                                                      |                        |
| Unit cell dimensions                                | <i>a</i> = 10.8510(8) Å                                          | <i>α</i> = 76.430(6)°. |
|                                                     | <i>b</i> = 11.3172(8) Å                                          | <i>β</i> = 80.054(5)°. |
|                                                     | <i>c</i> = 22.8051(13) Å                                         | <i>γ</i> = 66.930(7)°. |
| Volume                                              | 2494.4(3) Å <sup>3</sup>                                         |                        |
| <i>Z</i>                                            | 2                                                                |                        |
| Density (calculated)                                | 1.019 Mg/m <sup>3</sup>                                          |                        |
| Absorption coefficient                              | 3.538 mm <sup>-1</sup>                                           |                        |
| <i>F</i> (000)                                      | 832                                                              |                        |
| Crystal size                                        | 0.2862 × 0.1423 × 0.0853 mm <sup>3</sup>                         |                        |
| Theta range for data collection                     | 4.00 to 63.72°                                                   |                        |
| Index ranges                                        | -11 ≤ <i>h</i> ≤ 12, -11 ≤ <i>k</i> ≤ 12, -25 ≤ <i>l</i> ≤ 26    |                        |
| Reflections collected                               | 15902                                                            |                        |
| Independent reflections                             | 7794 [ <i>R</i> (int) = 0.0284]                                  |                        |
| Completeness to theta = 63.72°                      | 94.7%                                                            |                        |
| Absorption correction                               | Analytical                                                       |                        |
| Max. and min. transmission                          | 0.813 and 0.545                                                  |                        |
| Refinement method                                   | Full-matrix least-squares on <i>F</i> <sup>2</sup>               |                        |
| Data / restraints / parameters                      | 7794 / 0 / 434                                                   |                        |
| Goodness-of-fit on <i>F</i> <sup>2</sup>            | 1.065                                                            |                        |
| Final <i>R</i> indices [ <i>I</i> > 2σ( <i>I</i> )] | <i>R</i> 1 = 0.0332, <i>wR</i> 2 = 0.0880                        |                        |
| <i>R</i> indices (all data)                         | <i>R</i> 1 = 0.0365, <i>wR</i> 2 = 0.0913                        |                        |
| Absolute structure parameter                        | 0                                                                |                        |
| Largest diff. peak and hole                         | 0.321 and -0.220 e.Å <sup>-3</sup>                               |                        |

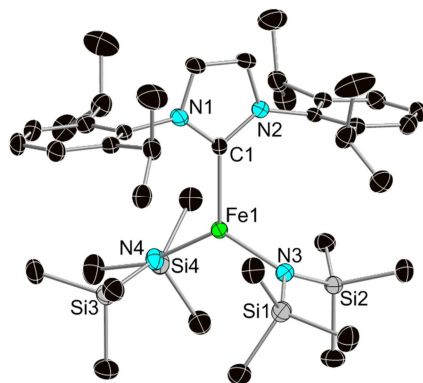

**Figure S1.** Molecular structure of **2**. Hydrogen atoms are omitted for clarity.

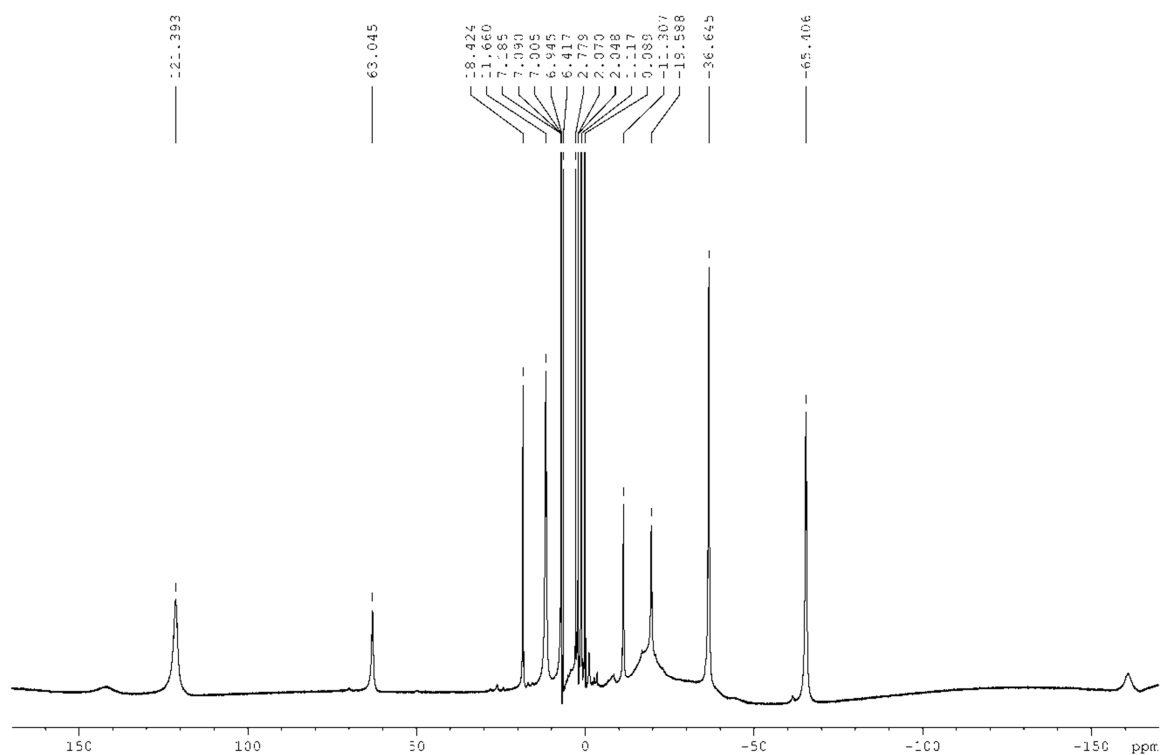

**Figure S2.**  $^1\text{H}$  NMR spectrum of **2** (toluene- $d_8$ , 228 K, 400.13 MHz). Assignments made where possible.  $\delta(^1\text{H})/\text{ppm}$ : 121.39 (SiMe<sub>3</sub> in **2**), 63.05 (SiMe<sub>3</sub> in **1**), 18.42 and 11.686 (aromatic CH in **2**), 7.19 (aromatic CH in IPr), 6.42 (imidazole CH in IPr), 2.78 (Me<sub>2</sub>CH), 1.12 (Me<sub>2</sub>CH), 0.09 (silicone grease), -11.31 (imidazole CH in **2**), -19.59 (IPr Me<sub>2</sub>CH in **2**), -36.65 (IPr Me<sub>2</sub>CH in **2**), -65.41 (IPr Me<sub>2</sub>CH in **2**).

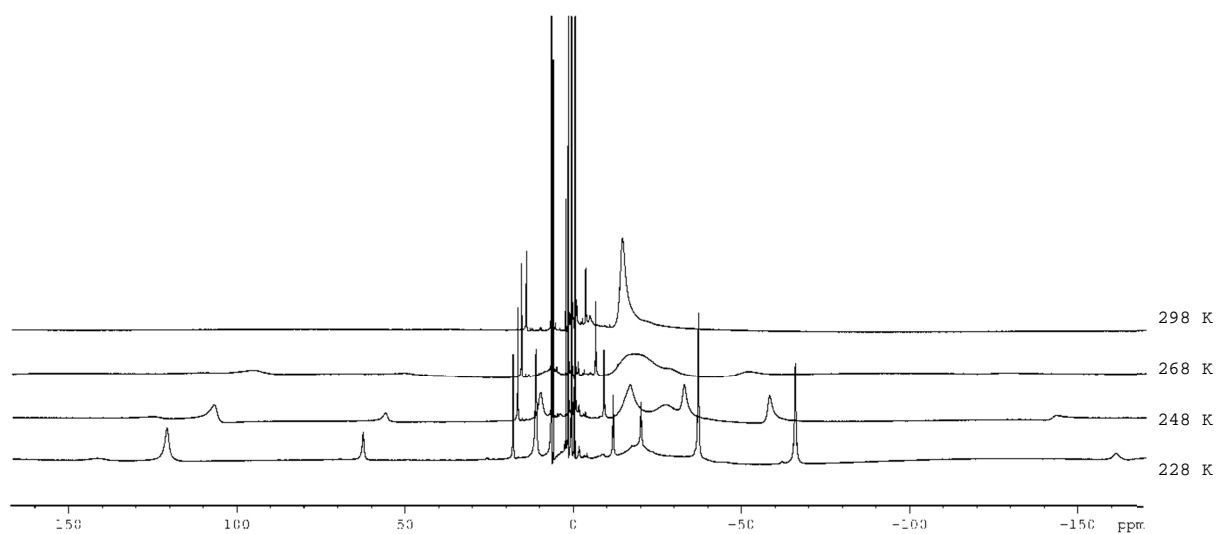

**Figure S3.** Variable temperature  $^1\text{H}$  NMR spectrum of **2** in toluene.

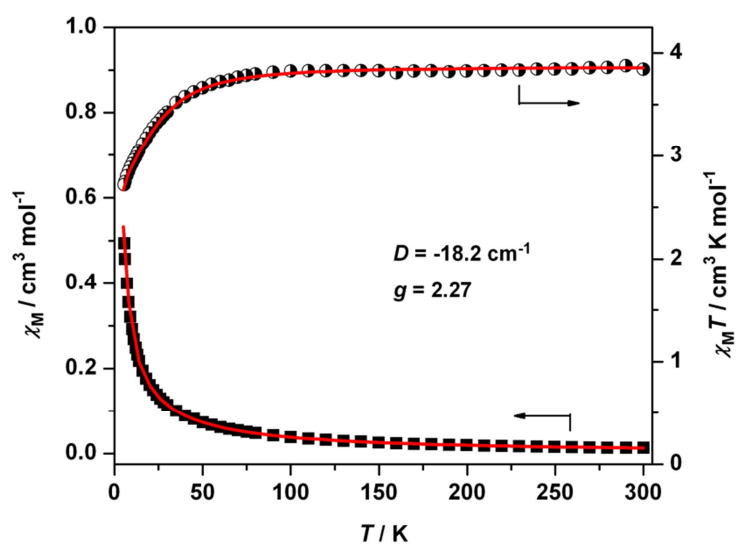

**Figure S4.** Plots of  $\chi_{\text{M}}$  vs.  $T$  and  $\chi_{\text{M}}T$  vs.  $T$  for **2**.

**Table S2.** Crystal data and structure refinement for [(IMes)Fe{N(SiMe<sub>3</sub>)<sub>2</sub>}<sub>2</sub>] (**3**)

|                                        |                                                                  |                             |
|----------------------------------------|------------------------------------------------------------------|-----------------------------|
| Empirical formula                      | C <sub>33</sub> H <sub>60</sub> FeN <sub>4</sub> Si <sub>4</sub> |                             |
| Formula weight                         | 681.06                                                           |                             |
| Temperature                            | 123 K                                                            |                             |
| Wavelength                             | 1.54178 Å                                                        |                             |
| Crystal system                         | Monoclinic                                                       |                             |
| Space group                            | C2/c                                                             |                             |
| Unit cell dimensions                   | $a = 16.6461(3) \text{ Å}$                                       | $\alpha = 90^\circ$ .       |
|                                        | $b = 14.2890(3) \text{ Å}$                                       | $\beta = 99.705(2)^\circ$ . |
|                                        | $c = 16.7741(3) \text{ Å}$                                       | $\gamma = 90^\circ$ .       |
| Volume                                 | 3932.72(13) Å <sup>3</sup>                                       |                             |
| Z                                      | 4                                                                |                             |
| Density (calculated)                   | 1.150 Mg/m <sup>3</sup>                                          |                             |
| Absorption coefficient                 | 4.432 mm <sup>-1</sup>                                           |                             |
| $F(000)$                               | 1472                                                             |                             |
| Crystal size                           | 0.4431 × 0.3543 × 0.2560 mm <sup>3</sup>                         |                             |
| Theta range for data collection        | 4.10 to 70.66°.                                                  |                             |
| Index ranges                           | -20 ≤ $h$ ≤ 13, -16 ≤ $k$ ≤ 11, -16 ≤ $l$ ≤ 20                   |                             |
| Reflections collected                  | 7577                                                             |                             |
| Independent reflections                | 3675 [ $R(\text{int}) = 0.0285$ ]                                |                             |
| Completeness to theta = 68.00°         | 99.3 %                                                           |                             |
| Absorption correction                  | Analytical                                                       |                             |
| Max. and min. transmission             | 0.438 and 0.281                                                  |                             |
| Refinement method                      | Full-matrix least-squares on $F^2$                               |                             |
| Data / restraints / parameters         | 3675 / 0 / 200                                                   |                             |
| Goodness-of-fit on $F^2$               | 1.046                                                            |                             |
| Final $R$ indices [ $I > 2\sigma(I)$ ] | $R1 = 0.0408$ , $wR2 = 0.1068$                                   |                             |
| $R$ indices (all data)                 | $R1 = 0.0419$ , $wR2 = 0.1079$                                   |                             |
| Absolute structure parameter           | 0                                                                |                             |
| Largest diff. peak and hole            | 0.736 and -0.316 e.Å <sup>-3</sup>                               |                             |

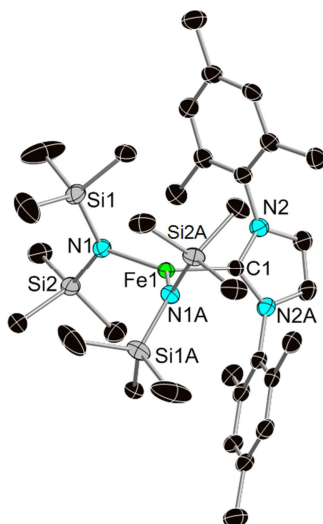

**Figure S5.** Molecular structure of **3**. Hydrogen atoms are omitted for clarity.

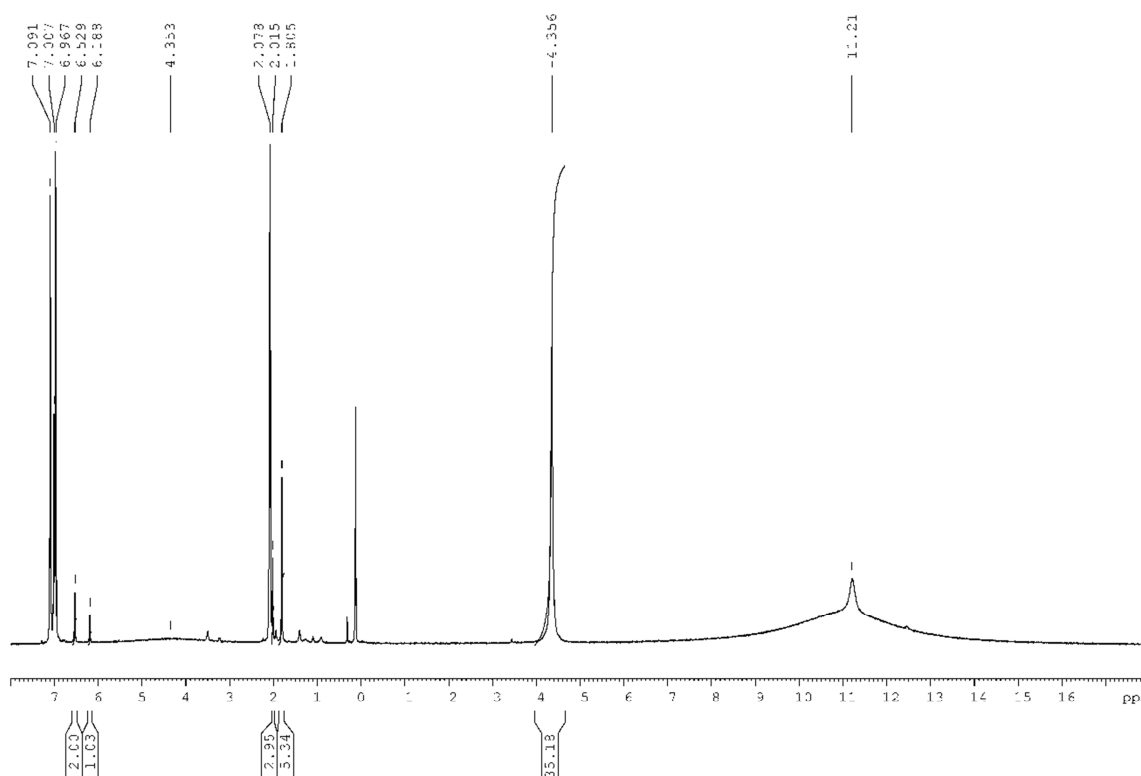

**Figure S6.**  $^1\text{H}$  NMR spectrum of **3** (toluene- $d_8$ , 273 K, 400.13 Hz) in the region 8 to  $-18$  ppm.  $\delta(^1\text{H})/\text{ppm}$ : 33.16, 6.53 (IMes aromatic CH), 6.19 (IMes imidazolylidene CH), 4.35 (imidazolylidene CH in **3**), 2.02 (IMes *para*-CH<sub>3</sub>), 1.81 (IMes *ortho*-CH<sub>3</sub>), 0.12 (silicone grease),  $-4.36$  (SiMe<sub>3</sub> in **3**),  $-11.21$  (CH<sub>3</sub> in **3**). At higher temperatures, the IMes methyl groups overlap with the toluene methyl solvent resonance.

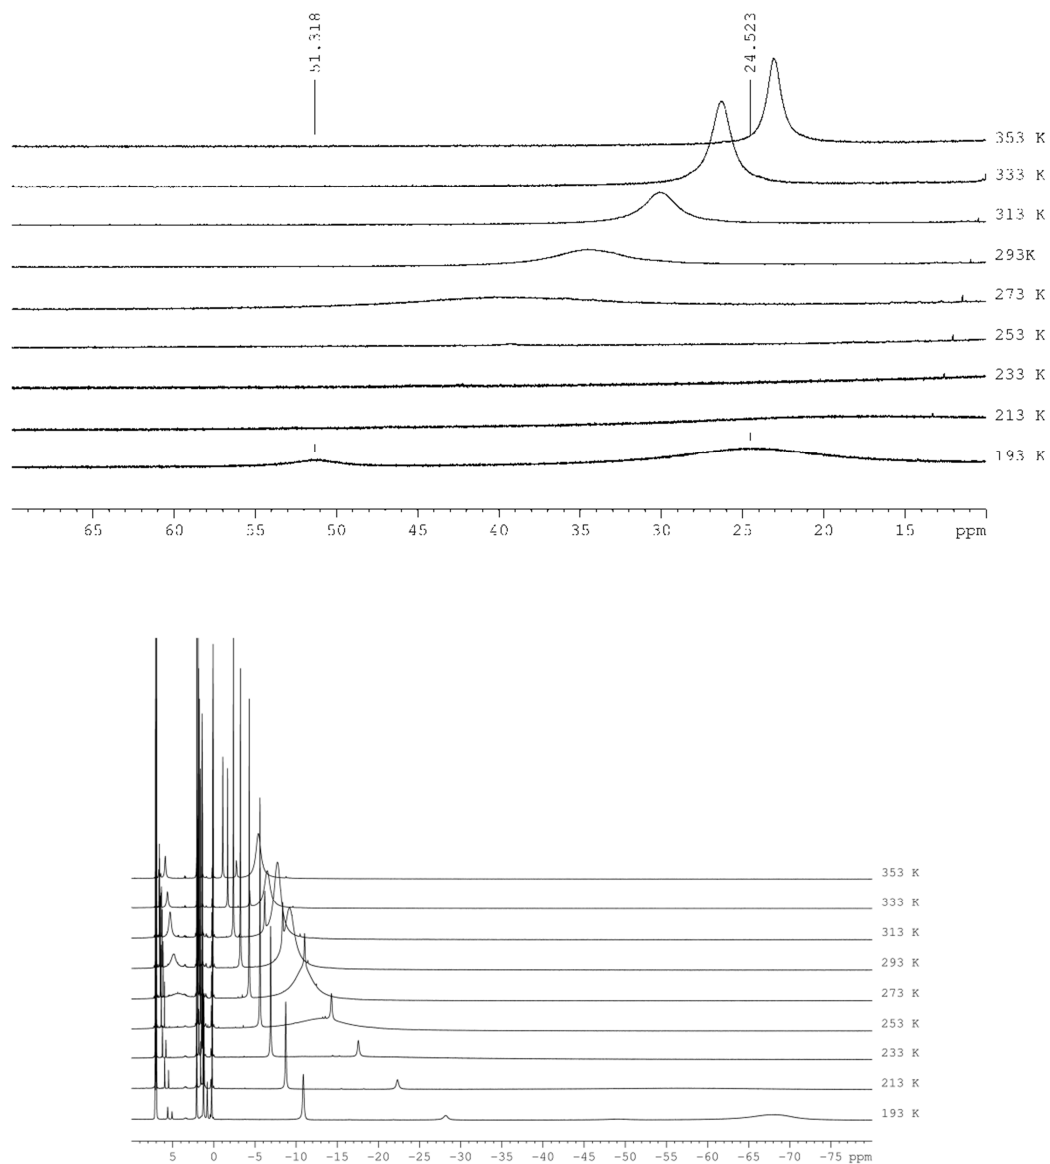

**Figure S7.**  $^1\text{H}$  NMR spectrum of **3** in the temperature range 193–353 K (toluene- $d_8$ , 400.13 Hz). Low-field region (upper) and high-field region (lower).



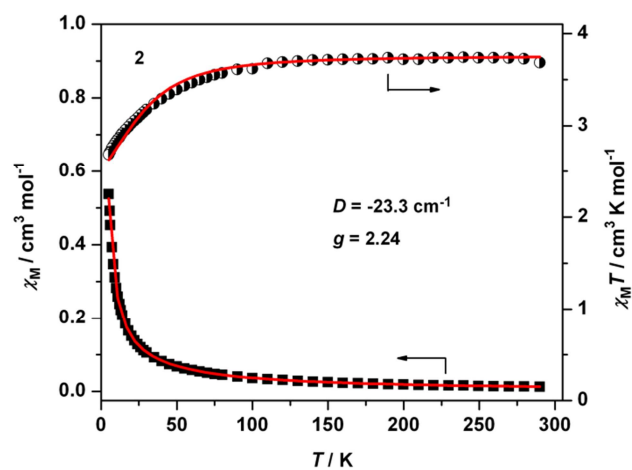

**Figure S8.** Plots of  $\chi_M$  vs.  $T$  and  $\chi_M T$  vs.  $T$  for **3**.

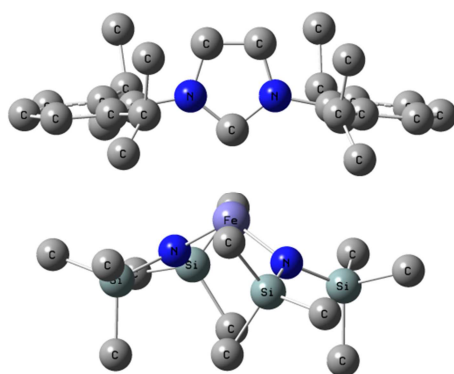

**Figure S9.** Structure of **2** optimized at the B3LYP/Def2-SVP level of theory with COSMO simulation in toluene. Hydrogen atoms not shown.

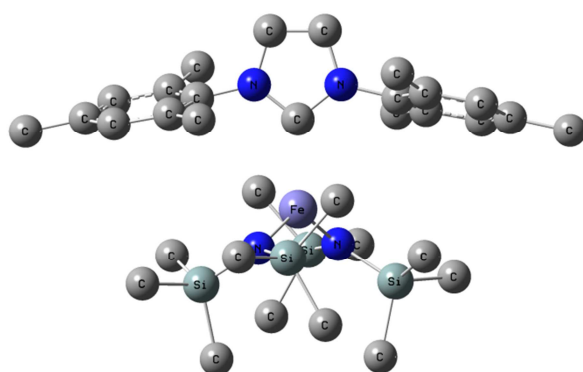

**Figure S10.** Structure of **3** optimized at the B3LYP/Def2-SVP level of theory with COSMO simulation in toluene. Hydrogen atoms not shown.

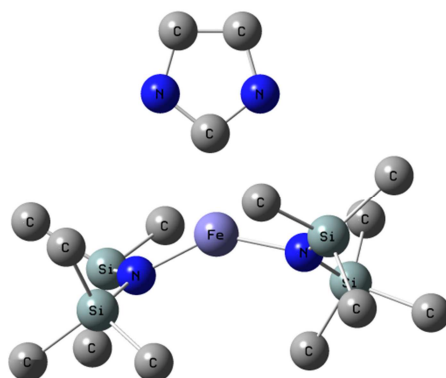

**Figure S11.** Structure of **5** optimized at the B3LYP/Def2-SVP level of theory with COSMO simulation in toluene. Hydrogen atoms not shown.

**Table S12.** Selected quasi-restricted orbitals for **5** (B3LYP/Def2-SVP, isosurface value = 0.04 a.u.)

|                                                                                     |                                                                                                            |
|-------------------------------------------------------------------------------------|------------------------------------------------------------------------------------------------------------|
| 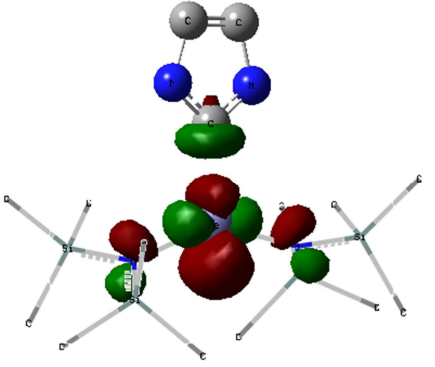   | <br>-3.229 eV (No. 121)   |
|    | <br>-3.870 eV (No. 120)   |
|  | <br>-4.113 eV (No. 119) |
|  | <br>-4.301 eV (No. 118) |

|  |                         |
|--|-------------------------|
|  | <br>-5.026 eV (No. 117) |
|  | <br>-7.367 eV (No. 112) |
|  | <br>-8.543 eV (No. 102) |
|  | <br>-9.083 eV (No. 101) |
|  | <br>-9.326 eV (No. 100) |

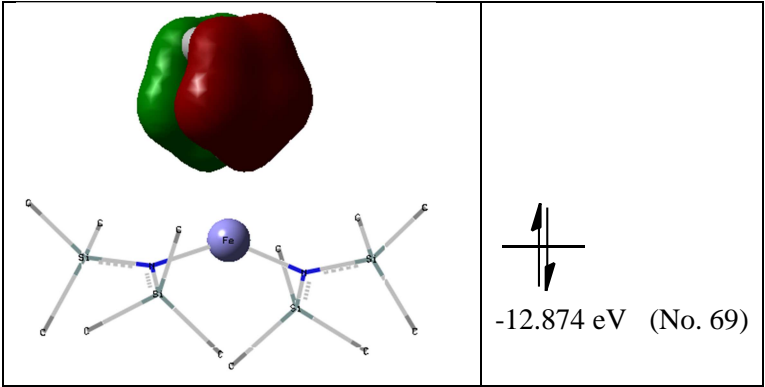

Supplement: c1cc14576b.pdf [file c1cc14576b.pdf]
